# Supplementary material
Source: Springer Nature journal article supplement (https://www.springermedizin.de/resource/supplementary/12893_2009_138_MOESM1_ESM.pdf/9513024)

# APACHE III Prediction of Hospital Mortality

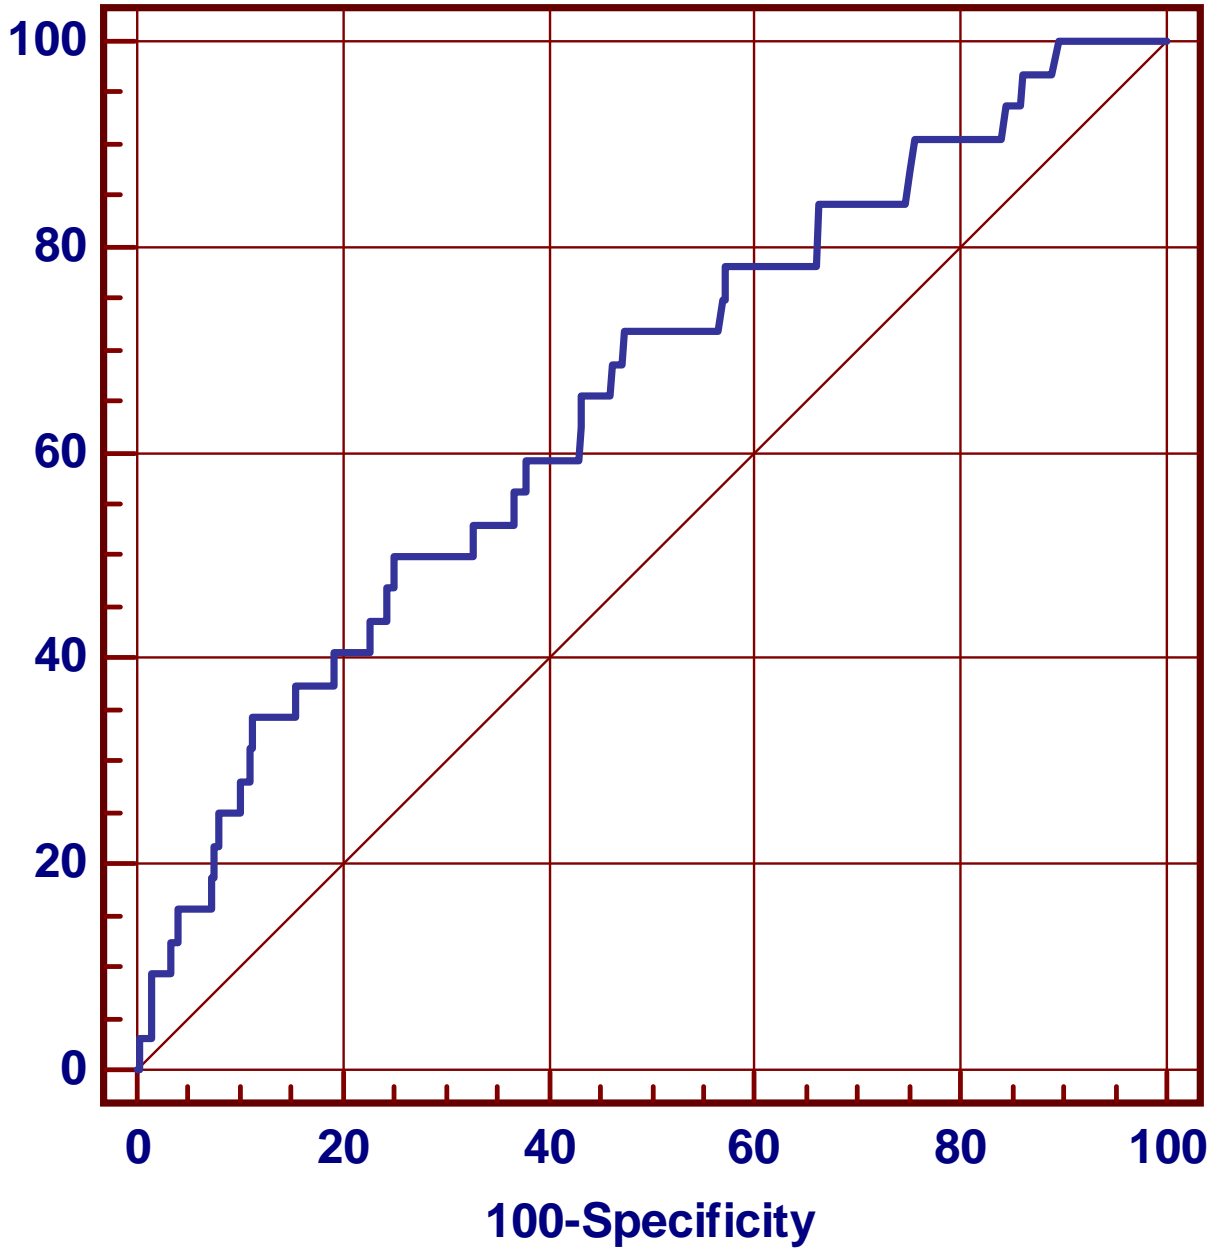

Supplement: MOESM1 [file 9513024]
